# Supplementary material for: Comparison and Validation of Rapid Molecular Testing Methods for Theranostic Epidermal Growth Factor Receptor Alterations in Lung Cancer: Idylla versus Digital Droplet PCR
Source: MDPI journal article supplement (doi:10.3390/ijms242115684), 2023-10-27
Supplement: s1 [file s1]

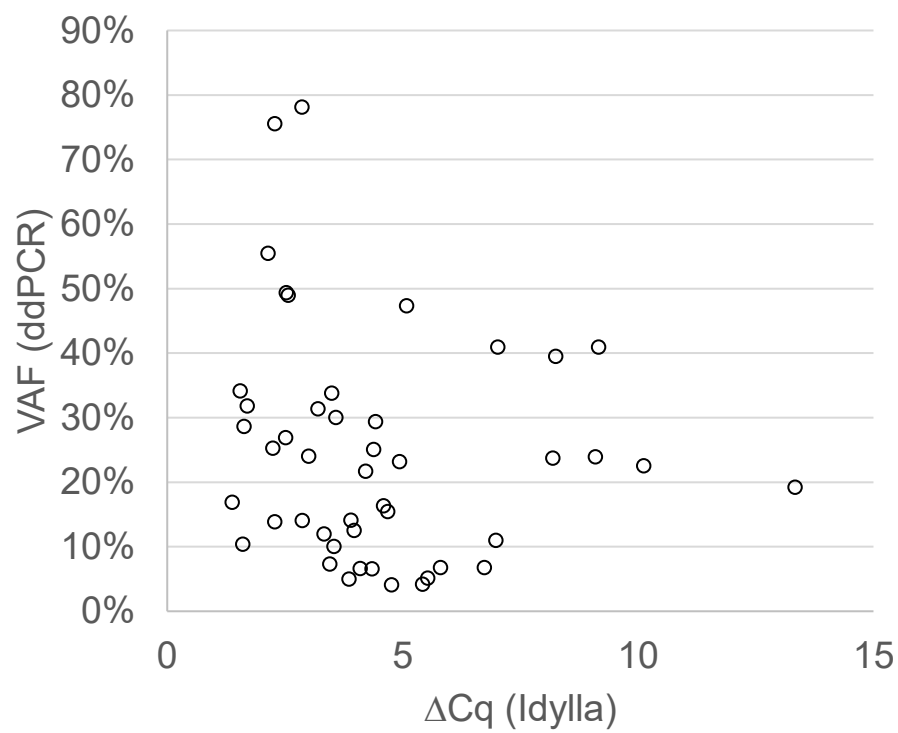

**Figure S1.** The estimated variant frequencies are not correlated

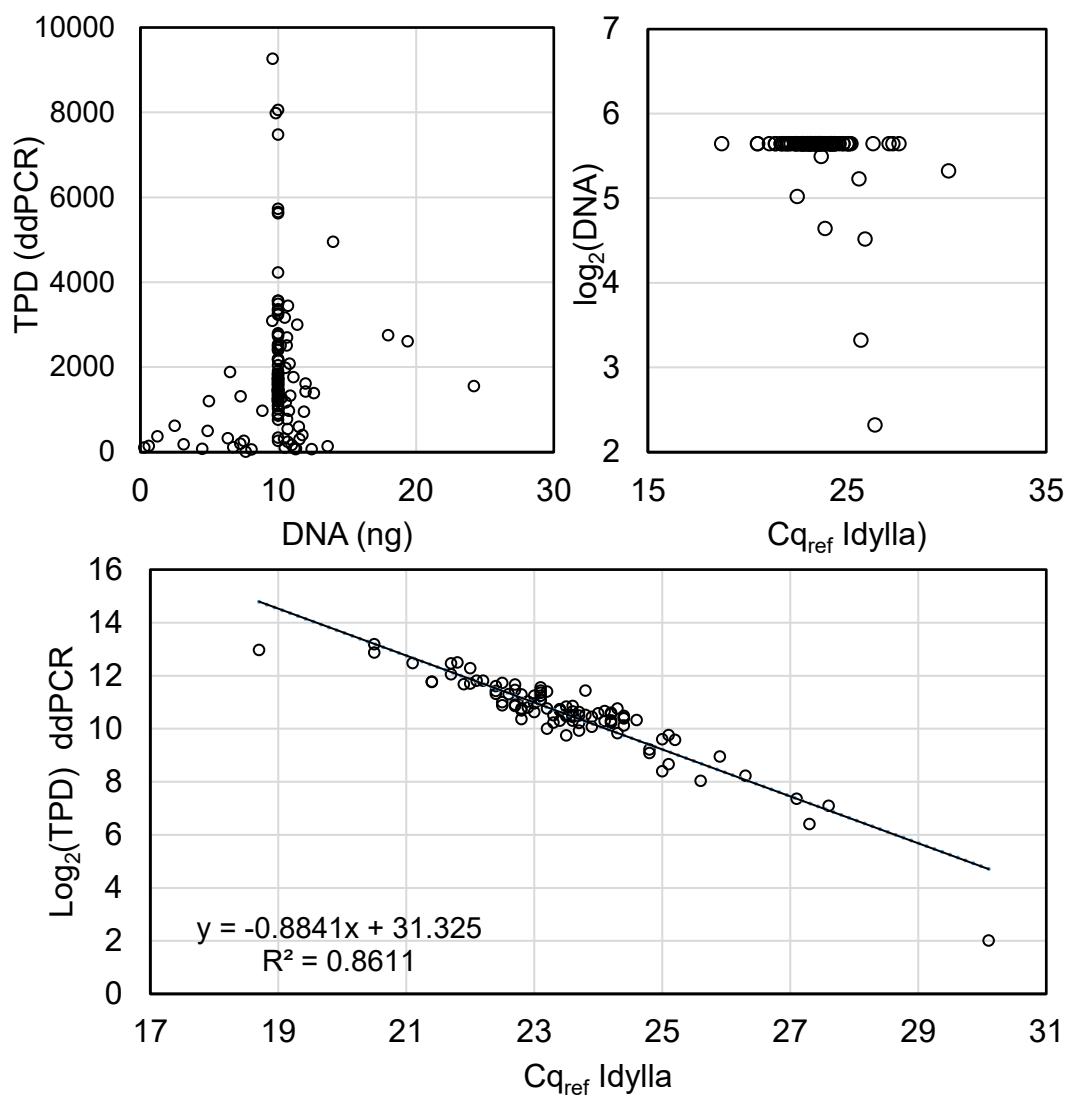

**Figure S2.** Robustness evaluation

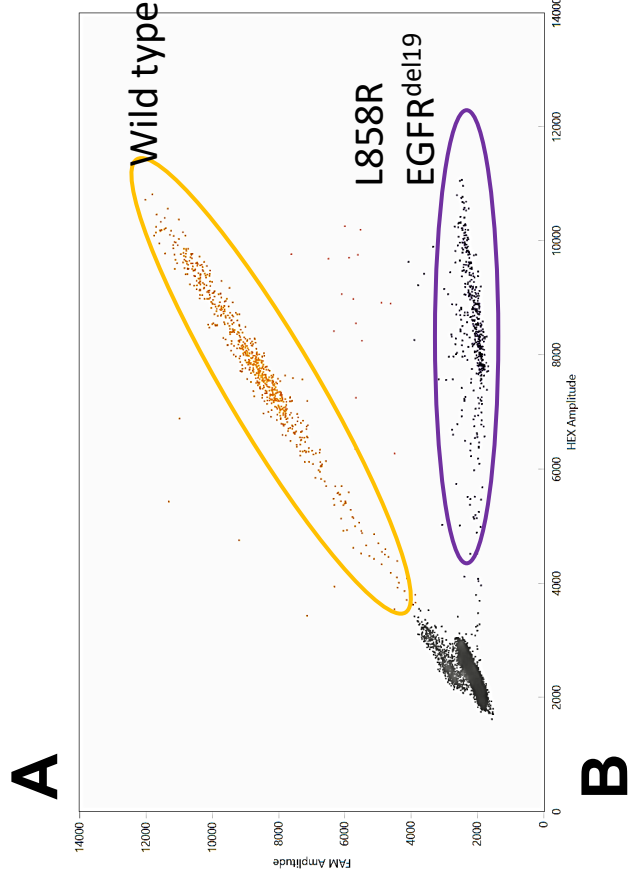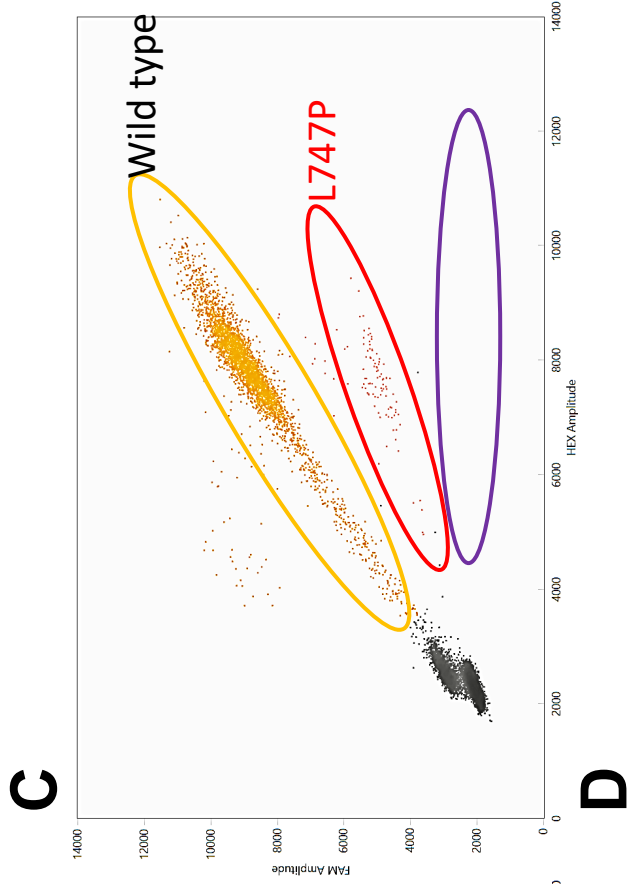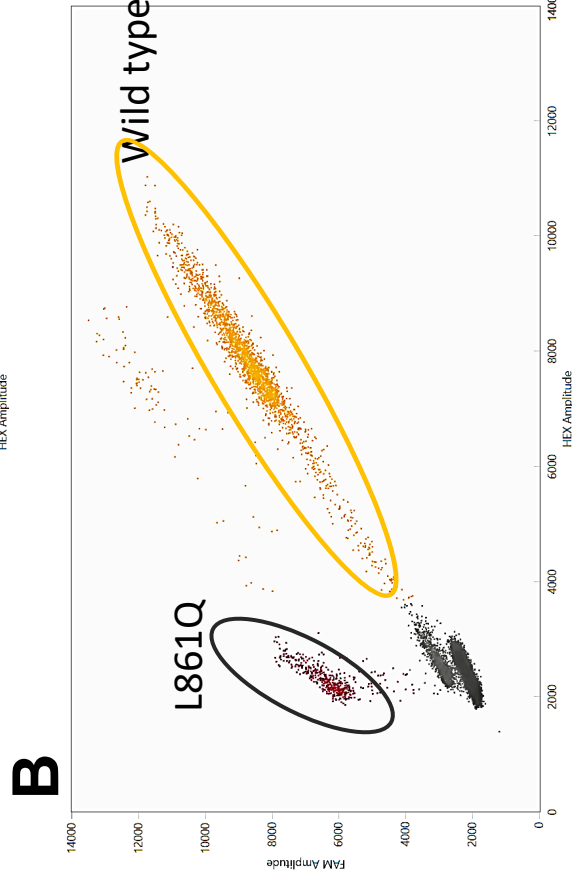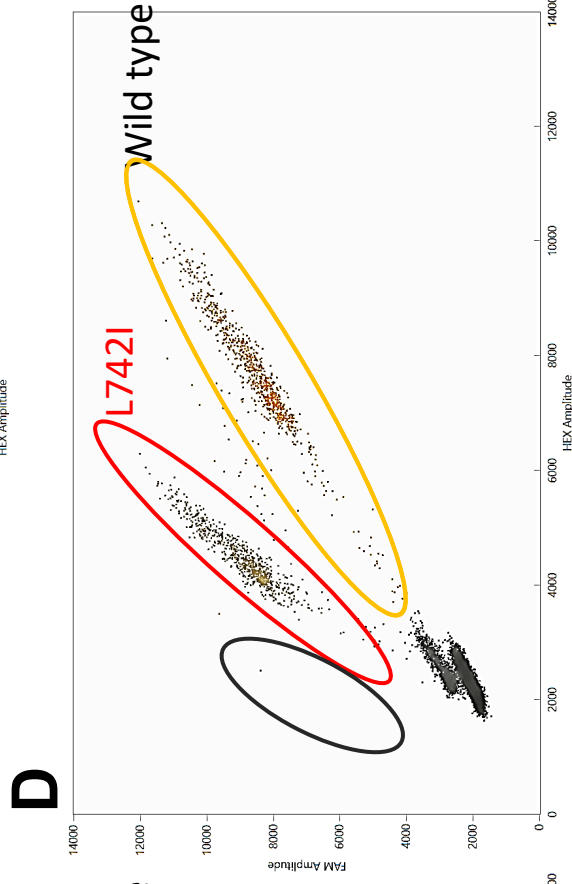

**Figure S3.** Results of ddPCR testing of SNP in position p.747 and p.742

# **Mutations detectable by the Idylla™ EGFR Mutation Assay**

| Exon    | Mutation | DNA alteration                                                                                                                                                                                                                                                                       |
|---------|----------|--------------------------------------------------------------------------------------------------------------------------------------------------------------------------------------------------------------------------------------------------------------------------------------|
| Exon 18 | G719A    | c.2156G > C                                                                                                                                                                                                                                                                          |
|         | G719C    | c.2155G > T; c.2154_2155delisTT                                                                                                                                                                                                                                                      |
|         | G719S    | c. c.2155G > A                                                                                                                                                                                                                                                                       |
| Exon 19 | Del 9    | c.2238_2248delinsGC; c.2239_2248delinsC;<br>c.2240_2248del; c.2239_2247del                                                                                                                                                                                                           |
|         | Del 12   | c.2239_2251delinsC; c.2240_2251del                                                                                                                                                                                                                                                   |
|         | Del 15   | c.2235_2249del; c.2236_2250del; c.2239_2253del;<br>c.2240_2254del; c.2238_2252del; c.2237_2251del;<br>c.2235_2252delinsAAT; c.2237_2252delinsT;<br>c.2234_2248del; c.2236_2253delinsCTA;<br>c.2237_2253delinsTA; c.2235_2251delinsAG;<br>c.2236_2253delinsCAA;c.2230_2249delinsGTCAA |
|         | Del 18   | c.2240_2257del; c.2237_2255delinsT; c.2239_2256del;<br>c.2236_2253del; c.2239_2258delinsCA; c.2237_2254del;<br>c.2238_2255del; c.2237_2257delinsTCT;<br>c.2236_2255delinsAT; c.2236_2256delinsATC;<br>c.2237_2256delinsTT;<br>c.2237_2256delinsTC;c.2235_2255delinsGGT               |
|         | Del 21   | c.2238_2258del; c.2236_2256del                                                                                                                                                                                                                                                       |
|         | Del 24   | c.2253_2276del                                                                                                                                                                                                                                                                       |
|         |          |                                                                                                                                                                                                                                                                                      |
| Exon 21 | L858R    | c.2573T > G; c.2573_2574delinsGT; c.2573_2574delinsGA                                                                                                                                                                                                                                |
|         | L861Q    | c.2582T > A                                                                                                                                                                                                                                                                          |

## **Targeted mutations and alterations detected by IDEGFR(b) SENSI-v3-50 Kit for ddPCR assays**

| Exon    | Mutation           | DNA alteration                   | Cosmic ID |
|---------|--------------------|----------------------------------|-----------|
| Exon 19 | p.E746_A750del (1) | c.2235_2249del15                 | COSM6223  |
|         | p.E746_A750del (2) | c.2236_2250del15                 | COSM6225  |
|         | p.L747_P753>S      | c.2240_2257del18                 | COSM12370 |
|         | p.E746_T751>I      | c.2235_2252>AAT (complex)        | COSM13551 |
|         | p.E746_T751del     | c.2236_2253del18                 | COSM12728 |
|         | p.E746_T751>A      | c.2237_2251del15                 | COSM12678 |
|         | p.E746_S752>A      | c.2237_2254del18                 | COSM12367 |
|         | p.E746_S752>V      | c.2237_2255>T(complex)           | COSM12384 |
|         | p.E746_S752>D      | c.2238_2255del18                 | COSM6220  |
|         | p.L747_A750>P      | c.2238_2248>GC (complex)         | COSM12422 |
|         | p.L747_T751>Q      | c.2238_2252>GCA (complex)        | COSM12419 |
|         | p.L747_E749del     | c.2239_2247del9TTAAGAGAA         | COSM6218  |
|         | p.L747_S752del     | c.2239_2256del18                 | COSM6255  |
|         | p.L747_A750>P      | c.2239_2248TTAAGAGAAG>C(complex) | COSM12382 |
|         | p.L747_P753>Q      | c.2239_2258>CA (complex)         | COSM12387 |
|         | p.L747_T751>S      | c.2240_2251del12                 | COSM6210  |
|         | p.L747_T751del     | c.2240_2254del15                 | COSM12369 |
|         | p.L747_T751>P      | c.2239_2251>C(complex)           | COSM12383 |
|         | p.L747_T751del     | c.2238_2252del15                 | COSM23571 |
|         | p.L747_S752>Q      | c.2239_2256>CAA                  | COSM12403 |
|         | p.E746_T751>V      | c.2237_2252>T                    | COSM12386 |
|         | p.E746_T751>T      | c.2236_2253> ACG                 | /         |
|         | p.L747_A750>P      | c.2239_2250>CCC                  | /         |
|         | p.L747_K754>QL     | c.2239_2261>CAATT                | /         |
|         | p.E746_K754>EQHL   | c.2238_2261>GCAACATCT            | /         |
|         | p.E746_S752>EQ     | c.2238_2256>GCAA                 | /         |
|         | p.E746_A750>QP     | c.2236_2248>CAAC                 | COSM13557 |
|         | p.E746_T751>Q      | c.2236_2253>CAA                  | COSM22999 |
| Exon 21 | p.L858R            | c.2573-2574TG>GT                 | COSM6224  |
|         |                    | c.2573T>G                        | COSM12979 |
|         | p.L861Q            | c.2582T>A                        | COSM6213  |

**Figure S4.** List of del19 alterations predicted to be detected

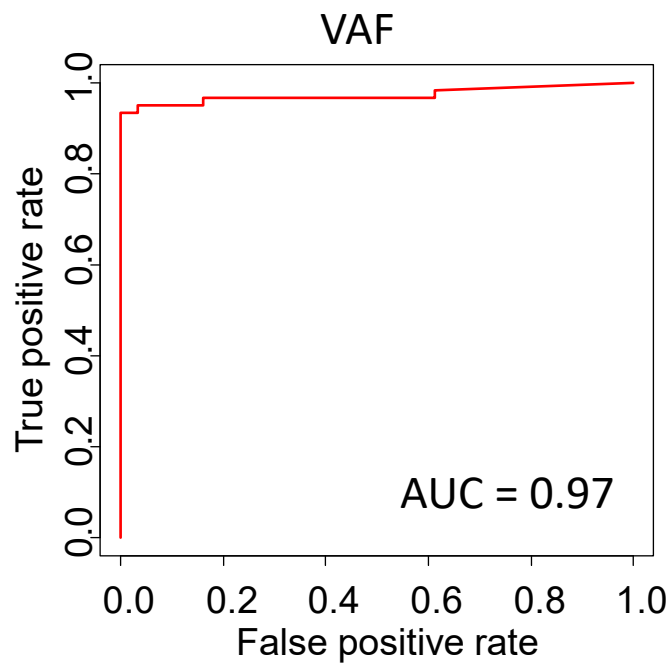

**Figure S5.** ROC curve analysed for VAF values obtained by ddPCR.
