# Supplementary material for: Comparison and Validation of Rapid Molecular Testing Methods for Theranostic Epidermal Growth Factor Receptor Alterations in Lung Cancer: Idylla versus Digital Droplet PCR
Source: Int J Mol Sci. 2023 Oct 27;24(21):15684. doi: 10.3390/ijms242115684 (PMC10648419; doi:10.3390/ijms242115684)
Supplement: Supplementary file 1 [file ijms-24-15684-s001.zip]

Archive with 4 entries (4 files):
- ijms-2676079 - Supplementary Figures S1-S5.pdf
- ijms-2676079 - Supplementary Table S1.xlsx
- ijms-2676079 - Supplementary Table S2.xlsx
- Supplementary informations.pdf
