# Supplementary material for: Comparison and Validation of Rapid Molecular Testing Methods for Theranostic Epidermal Growth Factor Receptor Alterations in Lung Cancer: Idylla versus Digital Droplet PCR
Source: Int J Mol Sci. 2023 Oct 27;24(21):15684. doi: 10.3390/ijms242115684 (PMC10648419; doi:10.3390/ijms242115684)
Supplement: Supplementary file 1 [file ijms-24-15684-s001.zip › ijms-2676079 - Supplementary Table S1.xlsx]

## Sheet: TCGA cohorts
PROTOCOL
1- Lung adenocarcinoma and NSCLC selected + exon 19
2- Double values erased
3- frameshift and stop mutations removed
4- 50 DNA alterations found AND 41 protein modifications found
5- Occurrence of each alteration among the total (554) EGFR DELETION INSERTION +++
Cbioportal_Studies
luad_broad	1
luad_cptac_2020	2
luad_msk_npjpo_2021	3
luad_mskcc_2015	4
luad_mskcc_2020	5
luad_mskimpact_2021	6
luad_oncosg_2020	7
luad_tcga	8
luad_tcga_pan_can_atlas_2018	9
luad_tcga_pub	10
luad_tsp	11
lung_msk_2017	12
lusc_cptac_2021	13
lusc_tcga	14
lusc_tcga_pan_can_atlas_2018	15
lusc_tcga_pub	16
nsclc_mskcc_2015	17
nsclc_mskcc_2018	18
nsclc_pd1_msk_2018	19
nsclc_tcga_broad_2016	20
nsclc_tracerx_2017	21
nsclc_unito_2016	22

## Sheet: Exon 19 alterations
Database (TCGA N=534, local N=625)	EGFR Exon 19 alteration - coding	Protein Change	Occurrence in the original database	Frequency in the original database	included in the study	Adjusted frequency in the joint cohort (N=1159)		0.951311	Frequency in the TCGA datase of the included del19
local	c.2237_2252delinsT	p.Glu746_Thr751delinsVal	3	0.0048	YES	0.00258844
local	c.2237_2257delinsTCT	p.Glu746_Pro753delinsValSer	3	0.0048	YES	0.00258844
local	c.2238_2248delinsGC	p.Leu747_Ala750delinsPro	3	0.0048	YES	0.00258844
local	c.2236_2248delinsCAAC	p.Glu746_Ala750delinsGlnPro	2	0.0032	YES	0.00172563
local	c.2236_2253delinsACT	p.Glu746_Ala750del	2	0.0032	YES	0.00172563
local	c.2237_2251delinsTTG	p.Glu746_Thr751delinsValAla	2	0.0032	YES	0.00172563
local	c.2239_2240delinsCC	p.Leu747Pro	2	0.0032	NO	0.00172563
local	c.2239_2253del	p.Leu747_Thr751del	2	0.0032	NO	0.00172563
local	c.2232_2248delinsTAAAATTC	p.Glu746_Ala750delinsIlePro	1	0.0016	YES	0.000862813
local	c.2235_2241delinsAATTCCC	p.Glu746_Leu747delinsIlePro	1	0.0016	YES	0.000862813
local	c.2235_2246del	p.Glu746_Glu749del	1	0.0016	NO	0.000862813
local	c.2235_2248delinsAATTC	p.Glu746_Ala750delinsIlePro	1	0.0016	NO	0.000862813
local	c.2235_2252delinsATT	p.Glu746_Thr751delinsLeu	1	0.0016	NO	0.000862813
local	c.2235_2253delinsAACC	p.Glu746_Ala750del	1	0.0016	YES	0.000862813
local	c.2235_2253delinsAATT	p.Glu746_Thr751delinsIle	1	0.0016	NO	0.000862813
local	c.2236_2248delinsACCC	p.Glu746_Ala750delinsThrPro	1	0.0016	NO	0.000862813
local	c.2236_2248delinsCTTC	p.Glu746_Ala750delinsLeuPro	1	0.0016	YES	0.000862813
local	c.2236_2248delinsGAAC	p.Leu747_Ala750delinsPro	1	0.0016	NO	0.000862813
local	c.2236_2251delinsCTTC	p.Glu746_Thr751delinsLeuPro	1	0.0016	NO	0.000862813
local	c.2236_2253del	p.Glu746_Thr751del	1	0.0016	YES	0.000862813
local	c.2236_2255delinsAT	p.Glu746_Ser752delinsIle	1	0.0016	YES	0.000862813
local	c.2236_2257delinsATGT	p.Glu746_Pro753delinsMetSer	1	0.0016	NO	0.000862813
local	c.2237_2248del	p.Glu746_Glu749del	1	0.0016	NO	0.000862813
local	c.2237_2248delinsCCC	p.Glu746_Ala750delinsAlaPro	1	0.0016	NO	0.000862813
local	c.2237_2251delinsTTC	p.Glu746_Thr751delinsValPro	1	0.0016	NO	0.000862813
local	c.2237_2252delinsTGCA	p.Glu746_Thr751delinsValGln	1	0.0016	NO	0.000862813
local	c.2237_2255delinsT	p.Glu746_Ser752delinsVal	1	0.0016	NO	0.000862813
local	c.2237_2256delinsTA	p.Glu746_Ser752delinsVal	1	0.0016	YES	0.000862813
local	c.2237_2256delinsTT	p.Glu746_Ser752delinsVal	1	0.0016	NO	0.000862813
local	c.2237_2257delinsTAT	p.Glu746_Pro753delinsValSer	1	0.0016	NO	0.000862813
local	c.2238_2252del	p.Leu747_Thr751del	1	0.0016	NO	0.000862813
local	c.2238_2256delinsG	p.Leu747_Ser752del	1	0.0016	NO	0.000862813
local	c.2238_2256delinsGCAA	p.Leu747_Ser752delinsGln	1	0.0016	YES	0.000862813
local	c.2239_2250delinsCCG	p.Leu747_Ala750delinsPro	1	0.0016	YES	0.000862813
local	c.2239_2253delinsCCT	p.Leu747_Thr751delinsPro	1	0.0016	YES	0.000862813
local	c.2239_2256delinsCAA	p.Leu747_Ser752delinsGln	1	0.0016	YES	0.000862813
local	c.2239_2259delinsCAACAT	p.Leu747_Pro753delinsGlnHis	1	0.0016	NO	0.000862813
local	c.2239_2260delinsCAAC	p.Leu747_Lys754delinsGlnGln	1	0.0016	YES	0.000862813
local	c.2239_2262delinsGCA	p.Leu747_Lys754delinsAla	1	0.0016	NO	0.000862813
local	c.2239_2262delinsTCGAAT	p.Leu747_Lys754delinsSerAsn	1	0.0016	NO	0.000862813
local	c.2239_2264delinsGCCAA	p.Leu747_Ala755delinsAlaAsn	1	0.0016	NO	0.000862813
local	c.2240_2259delinsCC	p.Leu747_Pro753delinsSer	1	0.0016	NO	0.000862813
local	c.2240_2264delinsCGAAAGA	p.Leu747_Ala755delinsSerLysAsp	1	0.0016	NO	0.000862813
local	c.2240_2264delinscgaaagg	p.Leu747_Ala755delinsSerLysGly	1	0.0016	YES	0.000862813
local	c.2245_2276delinsGAAAGCCAACAAGG	p.Ala750_Ile759delinsSerGlnGlnGly	1	0.0016	NO	0.000862813
local	c.2246_2273delinsAGCC	p.Ala750_Glu758delinsPro	1	0.0016	NO	0.000862813
local	c.2248_2276delinsCCGAA	p.Ala750_Ile759delinsProAsn	1	0.0016	YES	0.000862813
local	c.2303_2305delinsTCC	p.Ser768_Val769delinsIleLeu	1	0.0016	NO	0.000862813
local	c.2310_2311insGGGTTG	p.Asp770_Asn771insGlyLeu	1	0.0016	NO	0.000862813
local	c.2235_2249del	p.Glu746_Ala750del	235	0.376	YES	0.396031
local	c.2236_2250del	p.Glu746_Ala750del	120	0.192	YES	0.194996
local	c.2237_2255delinst	p.Glu746_Ser752delinsVal	46	0.0736	YES	0.0560828
local	c.2239_2248delinsC	p.Leu747_Ala750delinsPro	36	0.0576	YES	0.0517688
local	c.2240_2257del	p.Leu747_Pro753delinsSer	35	0.056	YES	0.064711
local	c.2240_2254del	p.Leu747_Thr751del	30	0.048	YES	0.0526316
local	c.2239_2256del	p.Leu747_Ser752del	16	0.0256	YES	0.0215703
local	c.2237_2251del	p.Glu746_Thr751delinsAla	10	0.016	YES	0.013805
local	c.2239_2251delinsC	p.Leu747_Thr751delinsPro	8	0.0128	YES	0.0103538
local	c.2235_2252delinsAAT	p.Glu746_Thr751delinsIle	4	0.0064	YES	0.00517688
local	c.2237_2256delinsTC	p.Glu746_Ser752delinsVal	4	0.0064	YES	0.00517688
local	c.2217_2234dup	p.Ile740_Lys745dup	3	0.0048	YES	0.00431406
local	c.2235_2251delinsAATTC	p.Glu746_Thr751delinsIlePro	3	0.0048	YES	0.00345125
local	c.2239_2247del	p.Leu747_Glu749del	3	0.0048	YES	0.0112166
local	c.2236_2252delinsAT	p.Glu746_Thr751delinsIle	2	0.0032	NO	0.00345125
local	c.2237_2253delinsCT	p.Glu746_Thr751delinsAla	2	0.0032	YES	0.00345125
local	c.2252_2276delinsA	p.Thr751_Ile759delinsAsn	2	0.0032	YES	0.00345125
local	c.2219_2236dup	p.Lys745_Glu746insValProValAlaIleLys	1	0.0016	YES	0.00172563
local	c.2237_2251delinsTCC	p.Glu746_Thr751delinsValPro	1	0.0016	NO	0.00431406
local	c.2237_2253delinsTTGCT	p.Glu746_Thr751delinsValAla	1	0.0016	NO	0.00172563
local	c.2237_2254del	p.Glu746_Ser752delinsAla	1	0.0016	YES	0.00776531
local	c.2239_2258delinsCA	p.Leu747_Pro753delinsGln	1	0.0016	YES	0.00172563
local	c.2253_2276del	p.Ser752_Ile759del	1	0.0016	NO	0.0069025
TCGA	c.2240_2259delinsCT	L747_P753delinsS	1	0.00187266	NO	0.000862813
TCGA	c.2260_2277del	K754_I759del	2	0.00374532	NO	0.00172563
TCGA	c.2240_2263delinsCGATGT	L747_A755delinsSMS	2	0.00374532	NO	0.00172563
TCGA	c.2236_2248delinsATTC	E746_A750delinsIP	2	0.00374532	NO	0.00172563
TCGA	c.2250_2274delinsG	T751_E758del	2	0.00374532	NO	0.00172563
TCGA	c.2238_2255delinsGCAACA	L747_S752delinsQH	2	0.00374532	NO	0.00172563
TCGA	c.2239_2250del	L747_A750del	2	0.00374532	NO	0.00172563
TCGA	c.2250_2264del	T751_A755del	1	0.00187266	NO	0.000862813
TCGA	c.2236_2250delinsCCT	E746_A750delinsP	1	0.00187266	NO	0.000862813
TCGA	c.2238_2250delinsC	E746_A750delinsD	1	0.00187266	NO	0.000862813
TCGA	c.2252_2275del	T751_E758del	3	0.00561798	NO	0.00258844
TCGA	c.2238_2253delinsG	L747_T751del	1	0.00187266	NO	0.000862813
TCGA	c.2238_2248delinsCA	E746_A750delinsDT	1	0.00187266	NO	0.000862813
TCGA	c.2237_2248delinsCAC	E746_A750delinsAP	1	0.00187266	NO	0.000862813
TCGA	c.2236_2257delinsCTCT	E746_P753delinsLS	2	0.00374532	NO	0.00172563
TCGA	c.2252_2277delinsAT	T751_I759delinsN	1	0.00187266	NO	0.000862813
TCGA	c.2214_2231dup	I740_K745dup	1	0.00187266	NO	0.000862813
TCGA	c.2235_2249del	E746_A750del	224	0.419476	YES	0.396031
TCGA	c.2236_2250del	E746_A750del	106	0.198502	YES	0.194996		0.925798
TCGA	c.2240_2257del	L747_P753delinsS	40	0.0749064	YES	0.064711
TCGA	c.2237_2253delinsCT	E746_T751delinsA	2	0.00374532	YES	0.00345125
TCGA	c.2237_2251del	E746_T751delinsA	6	0.011236	YES	0.013805
TCGA	c.2239_2256del	L747_S752del	9	0.0168539	YES	0.0215703
TCGA	c.2237_2253delinsTTGCT	E746_T751delinsVA	1	0.00187266	NO	0.00172563
TCGA	c.2239_2251delinsC	L747_T751delinsP	4	0.00749064	YES	0.0103538
TCGA	c.2240_2254del	L747_T751del	31	0.0580524	YES	0.0526316
TCGA	c.2239_2247del	L747_E749del	10	0.0187266	YES	0.0112166
TCGA	c.2252_2276delinsA	T751_I759delinsN	2	0.00374532	YES	0.00345125
TCGA	c.2239_2248delinsC	L747_A750delinsP	24	0.0449438	YES	0.0517688
TCGA	c.2253_2276del	S752_I759del	7	0.0131086	NO	0.0069025
TCGA	c.2237_2255delinsT	E746_S752delinsV	19	0.0355805	YES	0.0560828
TCGA	c.2237_2256delinsTC	E746_S752delinsV	2	0.00374532	YES	0.00517688
TCGA	c.2237_2251delinsTCC	E746_T751delinsVP	4	0.00749064	NO	0.00431406
TCGA	c.2237_2254del	E746_S752delinsA	8	0.0149813	YES	0.00776531
TCGA	c.2235_2251delinsAATTC	E746_T751delinsIP	1	0.00187266	YES	0.00345125
TCGA	c.2235_2252delinsAAT	E746_T751delinsI	2	0.00374532	YES	0.00517688
TCGA	c.2236_2252delinsAT	E746_T751delinsI	2	0.00374532	NO	0.00345125
TCGA	c.2239_2258delinsCA	L747_P753delinsQ	1	0.00187266	YES	0.00172563
TCGA	c.2217_2234dup	I740_K745dup	2	0.00374532	YES	0.00431406
TCGA	c.2219_2236dup	K745_E746insVPVAIK	1	0.00187266	YES	0.00172563

## Sheet: Adj frequencies
Étiquettes de lignes	Somme de Occurrence	frequency among all database		N=1159
c.2235_2249del	459	0.396031
c.2236_2250del	226	0.194996
c.2240_2257del	75	0.064711
c.2237_2255delinsT	65	0.0560828
c.2240_2254del	61	0.0526316
c.2239_2248delinsC	60	0.0517688
c.2239_2256del	25	0.0215703
c.2237_2251del	16	0.013805
c.2239_2247del	13	0.0112166
c.2239_2251delinsC	12	0.0103538
c.2237_2254del	9	0.00776531
c.2253_2276del	8	0.0069025
c.2235_2252delinsAAT	6	0.00517688
c.2237_2256delinsTC	6	0.00517688
c.2217_2234dup	5	0.00431406
c.2237_2251delinsTCC	5	0.00431406
c.2235_2251delinsAATTC	4	0.00345125
c.2236_2252delinsAT	4	0.00345125
c.2237_2253delinsCT	4	0.00345125
c.2252_2276delinsA	4	0.00345125
c.2237_2252delinsT	3	0.00258844
c.2237_2257delinsTCT	3	0.00258844
c.2238_2248delinsGC	3	0.00258844
c.2252_2275del	3	0.00258844
c.2219_2236dup	2	0.00172563
c.2236_2248delinsATTC	2	0.00172563
c.2236_2248delinsCAAC	2	0.00172563
c.2236_2253delinsACT	2	0.00172563
c.2236_2257delinsCTCT	2	0.00172563
c.2237_2251delinsTTG	2	0.00172563
c.2237_2253delinsTTGCT	2	0.00172563
c.2238_2255delinsGCAACA	2	0.00172563
c.2239_2240delinsCC	2	0.00172563
c.2239_2250del	2	0.00172563
c.2239_2253del	2	0.00172563
c.2239_2258delinsCA	2	0.00172563
c.2240_2263delinsCGATGT	2	0.00172563
c.2250_2274delinsG	2	0.00172563
c.2260_2277del	2	0.00172563
c.2214_2231dup	1	0.000862813
c.2232_2248delinsTAAAATTC	1	0.000862813
c.2235_2241delinsAATTCCC	1	0.000862813
c.2235_2246del	1	0.000862813
c.2235_2248delinsAATTC	1	0.000862813
c.2235_2252delinsATT	1	0.000862813
c.2235_2253delinsAACC	1	0.000862813
c.2235_2253delinsAATT	1	0.000862813
c.2236_2248delinsACCC	1	0.000862813
c.2236_2248delinsCTTC	1	0.000862813
c.2236_2248delinsGAAC	1	0.000862813
c.2236_2250delinsCCT	1	0.000862813
c.2236_2251delinsCTTC	1	0.000862813
c.2236_2253del	1	0.000862813
c.2236_2255delinsAT	1	0.000862813
c.2236_2257delinsATGT	1	0.000862813
c.2237_2248del	1	0.000862813
c.2237_2248delinsCAC	1	0.000862813
c.2237_2248delinsCCC	1	0.000862813
c.2237_2251delinsTTC	1	0.000862813
c.2237_2252delinsTGCA	1	0.000862813
c.2237_2255delinsT	1	0.000862813
c.2237_2256delinsTA	1	0.000862813
c.2237_2256delinsTT	1	0.000862813
c.2237_2257delinsTAT	1	0.000862813
c.2238_2248delinsCA	1	0.000862813
c.2238_2250delinsC	1	0.000862813
c.2238_2252del	1	0.000862813
c.2238_2253delinsG	1	0.000862813
c.2238_2256delinsG	1	0.000862813
c.2238_2256delinsGCAA	1	0.000862813
c.2239_2250delinsCCG	1	0.000862813
c.2239_2253delinsCCT	1	0.000862813
c.2239_2256delinsCAA	1	0.000862813
c.2239_2259delinsCAACAT	1	0.000862813
c.2239_2260delinsCAAC	1	0.000862813
c.2239_2262delinsGCA	1	0.000862813
c.2239_2262delinsTCGAAT	1	0.000862813
c.2239_2264delinsGCCAA	1	0.000862813
c.2240_2259delinsCC	1	0.000862813
c.2240_2259delinsCT	1	0.000862813
c.2240_2264delinsCGAAAGA	1	0.000862813
c.2240_2264delinscgaaagg	1	0.000862813
c.2245_2276delinsGAAAGCCAACAAGG	1	0.000862813
c.2246_2273delinsAGCC	1	0.000862813
c.2248_2276delinsCCGAA	1	0.000862813
c.2250_2264del	1	0.000862813
c.2252_2277delinsAT	1	0.000862813
c.2303_2305delinsTCC	1	0.000862813
c.2310_2311insGGGTTG	1	0.000862813
