# Supplementary material for: Comparison and Validation of Rapid Molecular Testing Methods for Theranostic Epidermal Growth Factor Receptor Alterations in Lung Cancer: Idylla versus Digital Droplet PCR
Source: Int J Mol Sci. 2023 Oct 27;24(21):15684. doi: 10.3390/ijms242115684 (PMC10648419; doi:10.3390/ijms242115684)
Supplement: Supplementary file 1 [file ijms-24-15684-s001.zip › ijms-2676079 - Supplementary Table S2.xlsx]

## Sheet: Feuil1
		EGFR alteration			Idylla				ddPCR				EGFR EXON18	EGFR EXON 19		EGFR EXON 20		EGFR EXON 21
N°	Class	Coding	Proteic	Tum. Cont. (%)	DNA (ng)	Detect.	DCq	Cq(ref)	DNA (ng)	del19 L858R	VAF	TPD	prot.	coding	prot.	coding	prot	coding	prot
1	SNP	c.2185G>A	p.G729R	µD	50	NO	na	26.3	11.56	NO	0	299	WT	c.2185G>A	p.G729R	c.2361G>A	WT	c.2484G>A	WT
2	SNP	c.2200G>A	p.E734K	µD	37.5	NO	na	25.6	7.53	NO	0	260	WT	c.2200G>A	p.E734K	c.2361G>A	WT	WT	WT
3	DEL19	c.2217_2234dup	p.I740_K745dup	50-80	50	NO, FN	na	20.5	9.62	NO, FN	0.000323939	9261	WT	c.2217_2234dup	p.Ile740_Lys745dup	WT	WT	WT	WT
4	DEL19	c.2219_2236dup	p.K745_E746insVPVAIK	10-30	50	NO, FNc	na	23.7	10	YES	0.010118	1186	WT	c.2219_2236dup	p.Lys745_Glu746insValProValAlaIleLys	WT	WT	WT	WT
5	SNP	c.2221C>T	p.P741S	30-50	50	NO	na	25	10	NO	0	335	WT	c.2221C>T	P741S	na	na	na	na
6	SNP	c.2224G>A	p.V742I/polQ787	µD	50	NO	na	23.1	10	NO	0	2401	WT	c.2224G>A	p.V742I	c.2361G>A	WT	na	na
7	DEL19	c.2232_2248delinsTAAAATTC	p.E746_A750delinsIP	10-30	50	NO, FN	na	22.6	10.64	YES	0.152373	2507	na	c.2232_2248delinsTAAAATTC	p.Glu746_Ala750delinsIlePro	na	na	na	na
8	DEL19	c.2235_2241delinsAATTCCC	p.E746_L747delinsIP	50-80	50	NO, FN	na	24.2	10	YES	0.367563	1227	WT	c.2235_2241delinsAATTCCC	p.Glu746_Leu747delinsIlePro	c.2361G>A	WT	WT	WT
9	DEL19	c.2235_2249del	p.E746_A750del	10-30	50	YES	5.8	22.8	10	YES	0.0680437	1646	WT	c.2235_2249del	p.Glu746_Ala750del	WT	WT	WT	WT
10	DEL19	c.2235_2249del	p.E746_A750del	50-80	50	YES	3.58	22.7	10	YES	0.300707	1839	WT	c.2235_2249del	p.Glu746_Ala750del	WT	WT	WT	WT
11	DEL19	c.2235_2249del	p.E746_A750del	50-80	na	na	na	na	10	YES	0.742159	2455	WT	c.2235_2249del	p.Glu746_Ala750del	WT	WT	WT	WT
12	DEL19	c.2235_2251delinsAATTC	p.E46_T751delinsIP	µD	na	na	na	na	12.45	YES	0.666667	63	WT	c.2235_2251delinsAATTC	p.Glu746_Thr751delinsIlePro	WT	WT	WT	WT
13	DEL19	c.2235_2252delinsAAT	p.E746_T751delinsI	10-30	50	YES	4.68	23.3	10	YES	0.154852	1453	na	c.2235_2252delinsAAT	p.Glu746_Thr751delinsIle	na	na	na	na
14	DEL19	c.2235_2253delinsAACC	p.E746_A750del	30-50	50	YES	5.08	24.1	10	YES	0.473473	1244	na	c.2235_2253delinsAACC	p.Glu746_Ala750del	na	na	na	na
15	DEL19	c.2235_2252delinsAAT	p.E746_T751delinsI	30-50	na	na	na	na	10.8	YES	0.478844	969	WT	c.2235_2252delinsAAT	p.Glu746_Thr751delinsIle	WT	WT	WT	WT
16	DEL19	c.2236_2248delinsCAAC	p.E746_A750delinsQP	10-30	50	YES	3.49	24.8	10.71	YES	0.33829	538	na	c.2236_2248delinsCAAC	p.Glu746_Ala750delinsGlnPro	na	na	na	na
17	DEL19	c.2236_2248delinsCTTC	p.E746_A750delinsLP	10-30	50	NO, FN	na	22.9	10.85	YES	0.282755	2076	na	c.2236_2248delinsCTTC	p.Glu746_Ala750delinsLeuPro	na	na	na	na
18	DEL19	c.2236_2250del	p.E746_A750del	< 10	50	NO, FNc	na	24.8	11.52	YES	0.0440678	590	na	c.2236_2250del	p.Glu746_Ala750del	na	na	na	na
19	DEL19	c.2236_2250del	p.E746_A750del	µD	50	YES	4.64	25.1	11.76	YES	0.341646	401	WT	c.2236_2250del	p.Glu746_Ala750del	WT	WT	WT	WT
20	DEL19	c.2236_2253del	p.E746_T751del	µD	na	na	na	na	6.37	YES	0.409938	322	na	c.2236_2253del	p.Glu746_Thr751del	na	na	na	na
20	DEL19	c.2236_2253del	p.E746_T751del	50-80	50	YES	4.42	23.4	10	YES	0.293943	1684	na	c.2236_2253del	p.Glu746_Thr751del	na	na	na	na
22	DEL19	c.2236_2253delinsACT	p.E746_A750del	µD	na	na	na	na	10.5	YES	0.700935	107	WT	c.2236_2253delinsACT	p.Glu746_Ala750del	c.2369C>T	p.T790M	WT	WT
23	DEL19	c.2236_2255delinsAT	p.E746_S752delinsI	µD	na	na	na	na	10.45	YES	0.410256	312	WT	c.2236_2255delinsAT	p.E746_S752delinsI	WT	WT	WT	WT
24	DEL19	c.2236_2250del	p.E746_A750del	µD	na	na	na	na	10	YES	0.335196	1611	WT	c.2236_2250del	p.Glu746_Ala750del	WT	WT	WT	WT
25	DEL19	c.2237_2251del	p.E746_T751delinsA	µD	50	YES	3.09	27.1	11	YES	0.705521	163	p.S720F	c.2237_2251del	p.Glu746_Thr751delinsAla	c.2361G>A	WT	WT	WT
26	DEL19	c.2237_2251del	p.E746_T751delinsA	< 10	na	na	na	na	10.5	YES	0.719481	3162	WT	c.2237_2251del	p.Glu746_Thr751delinsAla	WT	WT	WT	WT
27	DEL19	c.2237_2251delinsTTG	p.E746_T751delinsVA	30-50	50	YES	9.09	22.2	10	YES	0.239607	3560	na	c.2237_2251delinsTTG	p.Glu746_Thr751delinsValAla	na	na	na	na
28	DEL19	c.2237_2252delinsT	p.E746_T751delinsV	10-30	22.89	YES	4.38	25.9	4.91	YES	0.251012	494	na	c.2237_2252delinsT	p.Glu746_Thr751delinsVal	na	na	na	na
28	DEL19	c.2237_2252delinsT	p.E746_T751delinsV	µD	na	na	na	na	7.26	YES	0.376289	194	na	c.2237_2252delinsT	p.Glu746_Thr751delinsVal	na	na	na	na
30	DEL19	c.2237_2253delinsCT	p.E746_T751delinsA	µD	na	na	na	na	6.752	YES	0.768519	108	WT	c.2237_2253delinsCT	p.Glu746_Thr751delinsAla	c.2369C>T	p.T790M	WT	WT
31	DEL19	c.2237_2253delinsTTGCT	p.E746_T751delinsVA	µD	na	na	na	na	11.2	YES	0.420455	88	WT	c.2237_2253delinsTTGCT	p.E746_T751delinsVA	c.2361G>A	WT	WT	WT
32	DEL19	c.2237_2254del	p.E746_S752delinsA	µD	na	na	na	na	3.15	YES	0.269663	178	WT	c.2237_2254del	p.Glu746_Ser752delinsAla	WT	WT	WT	WT
33	DEL19	c.2237_2255delinsT	p.E746_S752delinsV	30-50	50	YES	13.33	22	10	YES	0.192423	3326	WT	c.2237_2255delinsT	p.Glu746_Ser752delinsVal	c.2361G>A	WT	WT	WT
34	DEL19	c.2237_2255delinsT	p.E746_S752delinsV	50-80	50	YES	9.16	24.3	10	YES	0.409827	1730	na	c.2237_2255delinsT	p.Glu746_Ser752delinsVal	na	na	na	na
35	DEL19	c.2237_2256delinsTA	p.E746_S752delinsV	µD	na	na	na	na	7.28	YES	0.7634	1306	WT	c.2237_2256delinsTA	p.Glu746_Ser752delinsVal	c.2361G>A	WT	WT	WT
36	DEL19	c.2237_2256delinsTC	p.E746_S752delinsV	10-30	50	YES	8.19	22.9	10	YES	0.237557	1768	WT	c.2237_2256delinsTC	p.Glu746_Ser752delinsVal	c.2361G>A	WT	WT	WT
37	DEL19	c.2237_2257delinsTCT	p.E746_P753delinsVS	µD	50	YES	12.92	21.4	10.72	YES	0.483309	3445	WT	c.2237_2257delinsTCT	p.Glu746_Pro753delinsValSer	c.2361G>A	WT	WT	WT
38	DEL19	c.2238_2248delinsGC	p.L747_A750delinsP	30-50	50	YES	4.93	22.1	10	YES	0.231807	3559	WT	c.2238_2248delinsGC	p.Leu747_Ala750delinsPro	WT	WT	WT	WT
38	DEL19	c.2238_2248delinsGC	p.L747_A750delinsP	µD	na	na	na	na	10	YES	0.337165	261	WT	c.2238_2248delinsGC	p.Leu747_Ala750delinsPro	WT	WT	WT	WT
40	DEL19	c.2238_2256delinsGCAA	p.L747_S752delinsQ	µD	na	na	na	na	11.88	YES	0.479495	951	WT	c.2238_2256delinsG	p.Leu747_Ser752del	c.2361G>A	WT	WT	WT
41	SNP	c.2239_2240delinsCC	p.L747P	< 10	50	NO	na	21.4	10	YES, FP	0.033534	3489	WT	c.2239_2240delinsCC	p.Leu747Pro	WT	WT	WT	WT
42	SNP	c.2239_2240delinsCC	p.L747P	µD	32.5	NO	na	22.5	6.52	YES, FP	0.955343	1881	WT	c.2239_2240delinsCC	p.L747P	c.2361G>A	WT	WT	WT
43	DEL19	c.2239_2247del	p.L747_E749del	30-50	50	YES	3	23.6	10	YES	0.240637	1255	na	c.2239_2247del	p.Leu747_Glu749del	na	na	na	na
44	DEL19	c.2239_2248delinsC	p.L747_A750delinsP	50-80	na	na	na	na	10.185	YES	0.333333	2508	WT	c.2239_2248delinsC	p.Leu747_Ala750delinsPro	WT	WT	WT	WT
45	DEL19	c.2239_2248delinsC	p.L747_A750delinsP	30-50	50	YES	3.2	22.4	10	YES	0.314082	2528	na	c.2239_2248delinsC	p.Leu747_Ala750delinsPro	na	na	na	na
45	DEL19	c.2239_2248delinsC	p.L747_A750delinsP	µD	na	na	na	na	10.57	YES	0.585408	1165	na	c.2239_2248delinsC	p.Leu747_Ala750delinsPro	na	na	na	na
47	DEL19	c.2239_2250delinsCCG	p.L747_A750delinsP	50-80	50	YES	2.53	23.8	10	YES	0.493836	1460	na	c.2239_2250delinsCCG	p.Leu747_Ala750delinsPro	na	na	na	na
47	DEL19	c.2239_2250delinsCCG	p.L747_A750delinsP	µD	na	na	na	na	11.28	YES	0.507692	65	na	c.2239_2250delinsCCG	p.Leu747_Ala750delinsPro	na	na	na	na
49	DEL19	c.2239_2251delinsC	p.L747_T751delinsP	10-30	50	YES	6.73	23.1	11.41	YES	0.0679773	3001	na	c.2239_2251delinsC	p.Leu747_Thr751delinsPro	na	na	na	na
50	DEL19	c.2239_2251delinsC	p.L747_T751delinsP	< 10	50	YES	6.98	23.1	10.02	YES	0.109972	2146	na	c.2239_2251delinsC	p.Leu747_Thr751delinsPro	na	na	na	na
51	DEL19	c.2239_2253delinsCCT	p.L747_T751delinsP	30-50	50	NO, FN	na	27.6	13.6	YES	0.610294	136	na	c.2239_2253delinsCCT	p.Leu747_Thr751delinsPro	na	na	na	na
52	DEL19	c.2239_2256del	p.L747_S752del	50-80	na	na	na	na	11.125	YES	0.398069	1761	WT	c.2239_2256del	p.Leu747_Ser752del	c.2369C>T	p.T790M	WT	WT
53	DEL19	c.2239_2256del	p.L747_S752del	30-50	50	YES	7.02	23.4	10	YES	0.40938	1258	na	c.2239_2256del	p.Leu747_Ser752del	na	na	na	na
54	DEL19	c.2239_2256delinsCAA	p.L747_S752delinsQ	µD	na	na	na	na	10.9	YES	0.822775	1326	na	c.2239_2256delinsCAA	p.L747_S752delinsQ	na	na	na	na
55	DEL19	c.2239_2258delinsCA	p.L747_P753delinsQ	30-50	50	YES	10.12	22.4	9.6	YES	0.225712	3088	na	c.2239_2258delinsCA	p.Leu747_Pro753delinsGln	na	na	na	na
56	DEL19	c.2239_2260delinsCAAC	p.L747_K754delinsQQ	30-50	50	NO, FN	na	22.8	10	YES	0.370948	2499	WT	c.2239_2260delinsCAAC	p.Leu747_Lys754delinsGlnGln	WT	WT	WT	WT
57	DEL19	c.2240_2254del	p.L747_T751del	na	na	na	na	na	8.08	YES	0.258065	62	WT	c.2240_2254del	p.Leu747_Thr751del	WT	WT	WT	WT
58	DEL19	c.2240_2254del	p.L747_T751del	µD	na	na	na	na	4.5	YES	0.369863	73	WT	c.2240_2254del	p.Leu747_Thr751del	c.2361G>A	WT	WT	WT
59	DEL19	c.2240_2254del	p.L747_T751del	50-80	50	YES	2.57	22.7	10	YES	0.489935	3229	WT	c.2240_2254del	p.Leu747_Thr751del	c.2361G>A	WT	WT	WT
60	DEL19	c.2240_2254del	p.L747_T751del	µD	na	na	na	na	10.71	YES	0.890295	237	na	c.2240_2254del	p.Leu747_Thr751del	na	na	na	na
60	DEL19	c.2240_2254del	p.L747_T751del	10-30	50	YES	2.14	24.2	24.2	YES	0.555055	1553	na	c.2240_2254del	p.Leu747_Thr751del	na	na	na	na
62	DEL19	c.2240_2254del	p.L747_T751del	50-80	50	YES	2.28	20.5	10	YES	0.755752	7476	na	c.2240_2254del	p.Leu747_Thr751del	na	na	na	na
63	DEL19	c.2240_2257del	p.L747_P753delinsS	µD	50	NO, FN	na	27.3	11.3	YES	0.202381	84	WT	c.2240_2257del	p.Leu747_Pro753delinsSer	c.2361G>A	WT	WT	WT
64	DEL19	c.2240_2257del	p.L747_P753delinsS	50-80	50	YES	8.25	23.9	10	YES	0.394964	1390	WT	c.2240_2257del	p.Leu747_Pro753delinsSer	c.2361G>A	WT	WT	WT
65	DEL19	c.2240_2257del	p.L747_P753delinsS	30-50	na	na	na	na	10	YES	0.411565	1470	WT	c.2240_2257del	p.Leu747_Pro753delinsSer	WT	WT	WT	WT
66	DEL19	c.2240_2257del	p.L747_P753delinsS	30-50	50	YES	2.86	21.1	10	YES	0.781355	5653	WT	c.2240_2257del	p.Leu747_Pro753delinsSer	WT	WT	WT	WT
67	DEL19	c.2240_2264delinsCGAAAGG	p.L747_A755delinsSKG	µD	40	NO, FNq	na	30.1	7.66	ni	0.75	4	WT	c.2240_2264delinscgaaagg	p.Leu747_Ala755delinsSerLysGly	c.2361G>A	WT	WT	WT
68	SNP	c.2240T>C	p.L747S/p.G719S	µD	45	NO	na	23.7	8.88	YES, FP	0.157849	971	p.G719S	c.2240T>C	p.L747S	c.2361G>A	WT	WT	WT
69	SNP	c.2243G>C	p.R748T	10-30	50	NO	na	24.2	10	NO	0	1269	na	c.2243G>C	p.R748T	na	na	na	na
70	DEL19	c.2248_2276delinsCCGAA	p.A750_I759delinsPN	50-80	50	NO, FN	na	23.5	10	NO, FN	0	855	WT	c.2248_2276delinsCCGAA	p.Ala750_Ile759delinsProAsn	c.2361G>A	WT	WT	WT
71	DEL19	c.2252_2276delinsA	p.T751_I759delinsN	30-50	50	NO, FN	na	23.2	10	NO, FN	0.00196271	1019	na	c.2252_2276delinsA	p.Thr751_Ile759delinsAsn	na	na	na	na
72	SNP	c.2263G>C	p.A755P	30-50	50	NO	na	22.7	10	NO	0.000358166	2792	WT	c.2263G>C	p.A755P	WT	WT	WT	WT
73	SNP	c.2281G>T	p.D761Y/p.G719A	30-50	50	NO	na	23	10	NO	0	1575	p.G719A	c.2281G>T	p.D761Y	na	na	na	na
74	L858R	c.2573T>G	p.L858R	< 10	50	NO, FNc	na	25	10.65	NO, FNc	0.00258065	775	WT	WT	WT	c.2361G>A	WT	c.2573T>G	p.L858R
75	L858R	c.2573T>G	p.L858R	< 10	50	YES	4.76	23.4	10	YES	0.0413123	1646	WT	WT	WT	WT	WT	c.2573T>G	p.L858R
76	L858R	c.2573T>G	p.L858R	< 10	50	YES	5.42	23.6	10	YES	0.042011	1452	WT	WT	WT	WT	WT	c.2573T>G	p.L858R
77	L858R	c.2573T>G	p.L858R	< 10	50	YES	3.86	23.6	12.6	YES	0.0498195	1385	WT	WT	WT	c.2361G>A	WT	c.2573T>G	p.L858R
78	L858R	c.2573T>G	p.L858R	10-30	50	YES	5.53	23.5	10	YES	0.0517052	1818	na	WT	WT	na	na	na	na
79	L858R	c.2573T>G	p.L858R	30-50	50	YES	4.35	23.1	19.4	YES	0.0660522	2604	p.E709A	WT	WT	c.2361G>A	WT	c.2573T>G	p.L858R
80	L858R	c.2573T>G	p.L858R	10-30	50	YES	4.1	23.5	10	YES	0.0663373	1417	WT	WT	WT	c.2361G>A	WT	c.2573T>G	p.L858R
81	L858R	c.2573T>G	p.L858R	30-50	na	na	na	na	0.3125	YES	0.0792079	101	WT	WT	WT	c.2361G>A	WT	c.2573T>G	p.L858R
81	L858R	c.2573T>G	p.L858R	30-50	na	na	na	na	0.625	YES	0.0482759	145	WT	WT	WT	c.2361G>A	WT	c.2573T>G	p.L858R
81	L858R	c.2573T>G	p.L858R	30-50	na	na	na	na	1.25	YES	0.119241	369	WT	WT	WT	c.2361G>A	WT	c.2573T>G	p.L858R
81	L858R	c.2573T>G	p.L858R	30-50	na	na	na	na	2.5	YES	0.114701	619	WT	WT	WT	c.2361G>A	WT	c.2573T>G	p.L858R
81	L858R	c.2573T>G	p.L858R	30-50	na	na	na	na	5	YES	0.0904523	1194	WT	WT	WT	c.2361G>A	WT	c.2573T>G	p.L858R
81	L858R	c.2573T>G	p.L858R	30-50	50	YES	3.54	22.7	10	YES	0.100682	1907	WT	WT	WT	c.2361G>A	WT	c.2573T>G	p.L858R
81	L858R	c.2573T>G	p.L858R	30-50	25	YES	3.93	23.9	na	na	na	na	WT	WT	WT	c.2361G>A	WT	c.2573T>G	p.L858R
81	L858R	c.2573T>G	p.L858R	30-50	10	YES	2.97	25.7	na	na	na	na	WT	WT	WT	c.2361G>A	WT	c.2573T>G	p.L858R
81	L858R	c.2573T>G	p.L858R	30-50	5	YES	4.88	26.4	na	na	na	na	WT	WT	WT	c.2361G>A	WT	c.2573T>G	p.L858R
82	L858R	c.2573T>G	p.L858R	10-30	50	YES	1.6	25.2	10	YES	0.103947	760	WT	WT	WT	WT	WT	c.2573T>G	p.L858R
83	L858R	c.2573T>G	p.L858R	10-30	50	YES	3.33	22.4	10	YES	0.12	2725	WT	WT	WT	c.2361G>A	WT	c.2573T>G	p.L858R
84	L858R	c.2573T>G	p.L858R	10-30	50	YES	3.97	23.8	18	YES	0.125409	2751	WT	WT	WT	c.2361G>A	WT	c.2573T>G	p.L858R
85	L858R	c.2573T>G	p.L858R	< 10	50	YES	2.28	24.6	10.26	YES	0.138932	1274	WT	WT	WT	c.2361G>A	WT	c.2573T>G	p.L858R
86	L858R	c.2573T>G	p.L858R	10-30	50	YES	2.87	23.3	10	YES	0.140704	1194	WT	WT	WT	c.2361G>A	WT	c.2573T>G	p.L858R
87	L858R	c.2573T>G	p.L858R	10-30	50	YES	3.9	23.2	10	YES	0.141122	1729	WT	WT	WT	c.2361G>A	WT	c.2573T>G	p.L858R
88	L858R	c.2573T>G	p.L858R	10-30	50	YES	4.59	22.8	10	YES	0.163623	1314	WT	WT	WT	c.2361G>A	WT	c.2573T>G	p.L858R
89	L858R	c.2573T>G	p.L858R	30-50	na	na	na	na	10	YES	0.171233	2190	WT	WT	WT	WT	WT	c.2573T>G	p.L858R
90	L858R	c.2573T>G	p.L858R	30-50	50	YES	4.21	21.7	10	YES	0.217278	4225	WT	WT	WT	c.2361G>A	WT	c.2573T>G	p.L858R
91	L858R	c.2573T>G	p.L858R	50-80	50	YES	2.24	23	10	YES	0.252706	2402	na	na	na	na	na	c.2573T>G	p.L858R
92	L858R	c.2573T>G	p.L858R	50-80	50	YES	2.51	23	10.53	YES	0.269464	1978	WT	WT	WT	c.2361G>A	WT	c.2573T>G	p.L858R
93	L858R	c.2573T>G	p.L858R	10-30	50	YES	1.63	21.8	10	YES	0.286437	5729	WT	WT	WT	c.2361G>A	WT	c.2573T>G	p.L858R
94	L858R	c.2573T>G	p.L858R	50-80	na	na	na	na	10	YES	0.311724	8052	WT	WT	WT	WT	WT	c.2573T>G	p.L858R
95	L858R	c.2573T>G	p.L858R	30-50	50	YES	1.7	23.5	10	YES	0.318337	1467	WT	WT	WT	WT	WT	c.2573T>G	p.L858R
96	L858R	c.2573T>G	p.L858R	10-30	50	YES	1.55	22	14	YES	0.341685	4949	WT	WT	WT	WT	WT	c.2573T>G	p.L858R
97	L858R	c.2573T>G, c.2303G>T	p.L858R, p.S768I	< 10	50	YES	3.45	22.5	10	YES	0.0732797	3357	WT	WT	WT	c.2303G>T	p.S768I	c.2573T>G	p.L858R
98	WT	WT	WT	< 10	50	NO	na	24.4	10.01	NO	0	1334	na	WT	WT	na	na	na	na
99	WT	WT	WT	50-80	50	NO	na	25.1	10	NO	0	862	na	WT	WT	na	na	na	na
100	WT	WT	WT	30-50	50	NO	na	24.2	10	NO	0	1187	na	WT	WT	na	na	na	na
101	WT	WT	WT	30-50	50	NO	na	24	10	NO	0	1527	na	WT	WT	na	na	na	na
102	WT	WT	WT	10-30	50	NO	na	23.9	10	NO	0	1073	na	WT	WT	na	na	na	na
103	WT	WT	WT	50-80	50	NO	na	18.7	9.85	NO	0	7980	na	WT	WT	na	na	na	na
104	WT	WT	WT	50-80	50	NO	na	23.1	10	NO	0.000459348	2177	na	WT	WT	na	na	na	na
105	WT	WT	WT	30-50	50	NO	na	22.5	10	NO	0.000490196	2040	WT	WT	WT	c.2361G>A	WT	WT	WT
106	WT	WT	WT	< 10	50	NO	na	22.8	10	NO	0.000581058	1721	WT	WT	WT	c.2361G>A	WT	WT	WT
107	WT	WT	WT	10-30	50	NO	na	23.7	10	NO	0.000636537	1571	na	WT	WT	na	na	na	na
108	WT	WT	WT	30-50	50	NO	na	24.2	10	NO	0.000668003	1497	na	WT	WT	na	na	na	na
109	WT	WT	WT	50-80	50	NO	na	21.7	10	NO	0.000889521	5621	na	WT	WT	na	na	na	na
110	WT	WT	WT	50-80	50	NO	na	23.6	10	NO	0.00108519	1843	WT	WT	WT	c.2361G>A	WT	WT	WT
111	WT	WT	WT	30-50	50	NO	na	24.3	10	NO	0.00110497	905	na	WT	WT	na	na	na	na
112	WT	WT	WT	50-80	50	NO	na	23.6	10	NO	0.00125	1600	na	WT	WT	na	na	na	na
113	WT	WT	WT	10-30	50	NO	na	24.4	12	NO	0.00140944	1419	na	WT	WT	na	na	na	na
114	WT	WT	WT	30-50	50	NO	na	23.4	10	NO	0.00176678	1698	na	WT	WT	na	na	na	na
115	WT	WT	WT	30-50	50	NO	na	24.4	10	NO	0.0018018	1110	na	WT	WT	na	na	na	na
116	WT	WT	WT	< 10	50	NO	na	24.1	12	NO	0.0018622	1611	na	WT	WT	na	na	na	na
117	WT	WT	WT	10-30	50	NO	na	23.7	10	NO	0.00208623	1438	na	WT	WT	na	na	na	na
118	WT	WT	WT	30-50	50	NO	na	23.6	10	NO	0.00210526	1425	na	WT	WT	na	na	na	na
119	WT	WT	WT	80-100	50	NO	na	23.2	10.65	NO	0.00222635	2695	na	WT	WT	na	na	na	na
120	WT	WT	WT	30-50	50	NO	na	21.9	10	NO	0.00245023	3265	na	WT	WT	na	na	na	na
121	WT	WT	WT	30-50	50	NO	na	24.4	10	NO	0.00293255	1364	WT	WT	WT	c.2361G>A	WT	WT	WT
122	L861Q	WT	p.L861Q	30-50	50	YES	1.38	23.1	10	YES	0.168897	2765	WT	WT	WT	c.2361G>A	WT	c.2582T>A	p.L861Q
